# Supplementary material
Source: MDPI journal article supplement (https://www.mdpi.com/2413-4155/5/1/3)
Supplement: s1 [file s1]

Archive with 1 entries (1 files):
- sci-2043591-supplementary.pdf
